1 ORIGINAL ARTICLE

2 **Running head:** COMPARING COLOURS

3 **Comparing colours using visual models**

4 Rafael Maia<sup>1,\*</sup> & Thomas E. White<sup>2,†</sup>

5 <sup>1</sup> Department of Ecology, Evolution and Environmental Biology, Columbia Uni-  
6 versity, New York, NY 10027, U.S.A.

7 <sup>2</sup> School of Life and Environmental Sciences, University of Sydney, Sydney, NSW,  
8 2006, Australia

9 \* [rm3368@columbia.edu](mailto:rm3368@columbia.edu)

10 † [thomas.white@mq.edu.au](mailto:thomas.white@mq.edu.au)

11 **Keywords:** vision, dimorphism, polymorphism, mimicry, crypsis, multivariate  
12 statistics

## <sup>13</sup> **Lay Summary**

<sup>14</sup> An outstanding challenge for the study of colour traits is how best to use "colour  
<sup>15</sup> spaces" to represent their visual perception, particularly when asking questions  
<sup>16</sup> of colour-difference (e.g. the (dis)similarity of males and females, mimics and  
<sup>17</sup> models, or sister species, to a given viewer). We use simulations to show that  
<sup>18</sup> existing methods fail to statistically and biologically estimate the separation of  
<sup>19</sup> groups in colour space, and we suggest a flexible, robust, alternative that avoids  
<sup>20</sup> those pitfalls.

## 21 **Abstract**

22 Colour in nature presents a striking dimension of variation, though understanding  
23 its function and evolution largely depends on our ability to capture the perspec-  
24 tive of relevant viewers. This goal has been radically advanced by the development  
25 and widespread adoption of colour spaces, which allow for the viewer-subjective  
26 estimation of colour appearance. Most studies of colour in camouflage, aposema-  
27 tism, sexual selection, and other signalling contexts draw on these models, with  
28 the shared analytical objective of estimating how similar (or dissimilar) colour  
29 samples are to a given viewer. We summarise popular approaches for estimating  
30 the separation of samples in colour space, and use a simulation-based approach  
31 to test their efficacy with common data structures. We show that these meth-  
32 ods largely fail to estimate the separation of colour samples by neglecting (i) the  
33 statistical distribution and within-group variation of the data, and/or (ii) the dis-  
34 criminability of groups relative to the observer's visual capabilities. Instead, we  
35 formalize the two questions that must be answered to establish both the statistical  
36 presence and theoretical magnitude of colour differences, and propose a two-step,  
37 permutation-based approach that achieves this goal. Unlike previous methods,  
38 our suggested approach accounts for the multidimensional nature of visual model  
39 data, and is robust against common colour-data features such as heterogeneity  
40 and outliers. We demonstrate the pitfalls of current methods and the flexibility of  
41 our suggested framework using an example from the literature, with recommen-  
42 dations for future inquiry.

## 43 Introduction

44 The study of colour in nature has driven fundamental advances in ecology and  
45 evolutionary biology (Cuthill *et al.*, 2017). Colour is a subjective experience, how-  
46 ever, so substantial effort has been dedicated to measuring and representing colours  
47 “objectively” (Garcia *et al.*, 2014; Johnsen, 2016) through visual models that con-  
48 sider the perspective of ecologically relevant viewers (Kemp *et al.*, 2015; Renoult  
49 *et al.*, 2017). These models have significantly advanced the study of colour traits  
50 by allowing researchers to account for the factors influencing the generation and  
51 reception of visual information, such as the structure of signals and viewing back-  
52 grounds, the properties of veiling and incident light, and the attributes of visual  
53 systems (Chittka, 1992; Endler & Mielke, 2005; Kelber *et al.*, 2003; Vorobyev &  
54 Osorio, 1998).

55 Several forms of visual models are currently used, which vary in their assump-  
56 tions about the nature of visual processing (Chittka, 1992; Endler & Mielke, 2005;  
57 Vorobyev & Osorio, 1998). These models function by delimiting a colour space  
58 informed by the number and sensitivity of photoreceptors in an animal’s retina  
59 (Renoult *et al.*, 2017). Individual colours are then represented in this space as  
60 points, with their location determined by the differential stimulation of the view-  
61 ers’ receptors.

62 This colour space representation is convenient for several reasons. It offers an  
63 intuitive way of analysing phenotypes that we cannot measure directly: we can  
64 estimate how animals with different visual systems “see” different colours by rep-  
65 resenting them in a Cartesian coordinate system, producing a receiver-dependent  
66 morphospace (Kelber *et al.*, 2003; Renoult *et al.*, 2017). Further, it allows estimating  
67 how similar or dissimilar colours are *to a given observer*, by measuring the distance  
68 between colour points in its colour space (Endler & Mielke, 2005; Vorobyev *et al.*,  
69 1998; Vorobyev & Osorio, 1998). Crucially, we can test and refine these mod-  
70 els using psychophysical data (e.g. Dyer & Neumeyer, 2005; Garcia *et al.*, 2017;

71 Maier, 1992; Vorobyev *et al.*, 2001), to estimate the magnitude of colour-differences  
72 and ultimately predict whether an observer could effectively discriminate pairs  
73 of colours (Chittka, 1992; Vorobyev & Osorio, 1998). This final point is critical to  
74 many tests of ecological and evolutionary hypotheses, such as the efficacy of cam-  
75 ouflage (Pessoa *et al.*, 2014; Troscianko *et al.*, 2016), the presence of polymorphism  
76 or dichromatism (Schultz & Fincke, 2013; Whiting *et al.*, 2015), the accuracy of  
77 mimicry (O’Hanlon *et al.*, 2014; White *et al.*, 2017), the extent of signal variability  
78 among populations or species (Delhey & Peters, 2008; Rheindt *et al.*, 2014), or the  
79 effect of experimental manipulations (Barry *et al.*, 2015; White & Kemp, 2017). At  
80 the heart of these inquiries lies the same question: *how different are these colours to*  
81 *the animal viewing them?*

### 82 *Challenges in estimating the discriminability of colour samples*

83 The receptor noise-limited model of Vorobyev & Osorio (1998) has proven partic-  
84 ularly useful for addressing questions of discriminability and colour-difference.  
85 The model is focused on receptor-level processes, and assumes that chromatic  
86 and achromatic channels operate independently (which does not necessarily hold  
87 beyond the receptor level in some species, such as humans; Nathans, 1999), that  
88 colour is coded by  $n - 1$  unspecified opponent mechanisms (where  $n$  is the number  
89 of receptor channels), and that the limits to colour discrimination are set by noise  
90 arising in receptors (Vorobyev *et al.*, 1998; Vorobyev & Osorio, 1998). This noise  
91 is dependent on the receptor type and abundance on the retina which, along with  
92 Weber’s law ( $k = \Delta I / I$ ) more generally, ultimately establishes the unit of Just No-  
93 ticeable Differences (JND Vorobyev *et al.*, 2001). Distances calculated in this man-  
94 ner correspond to the Mahalanobis Distance  $D_M$ , and represent distances between  
95 points standardized by the Weber fraction; i.e.  $\frac{\text{signal}}{\text{noise}}$  (Clark *et al.*, 2017). It follows  
96 that values lower than 1 JND ( $\frac{\text{signal}}{\text{noise}} < 1$ ) are predicted to be indistinguishable,  
97 while values greatly above this threshold are likely distinct. This provides a use-  
98 ful standard for estimating the similarity of groups of points in colour space: the

99 greater the distance between colours, the less alike they are. If differences are,  
100 on average, above an established threshold, then we can consider the groups dif-  
101 ferent: sexes dichromatic, mimetism imperfect, crypsis ineffective. This offers a  
102 clear link between variation and classification within a sensory framework, and  
103 has been widely used for this purpose (Barry *et al.*, 2015; Delhey & Peters, 2008;  
104 O’Hanlon *et al.*, 2014; Schultz & Fincke, 2013; White *et al.*, 2017; White & Kemp,  
105 2017).

106 To adequately compare samples of colours, however, it is necessary to deter-  
107 mine if the average distance between them is both statistically and biologically  
108 meaningful (i.e. above-threshold; Endler & Mielke, 2005). Commonly, an “average  
109 colour” for each group is derived by taking a mean reflectance spectrum or by  
110 averaging their position in colour space. In either case, the colour distance be-  
111 tween groups is then calculated from these mean quantum catches per-receptor  
112 per-group — their centroids in multivariate space (Fig. 1, bold arrow). However,  
113 the centroid obtained from arithmetic means of receptor coordinates is not an  
114 appropriate measure of location for this purpose, since colour distances are per-  
115 ceived in a ratio scale (Cardoso & Gomes, 2015). Instead, the geometric mean must  
116 be used. Further, since the result is a single value representing the multivariate  
117 distance between group means, there is no associated measure of uncertainty or  
118 precision that would allow for the statistical testing of differences between samples  
119 (e.g. Avilés *et al.*, 2011; Burns & Shultz, 2012; Maia *et al.*, 2016).

120 An alternative approach calculates the pairwise distances between all points  
121 in group A and group B, then averages these distances to obtain a mean distance  
122 between groups ( Fig. 1, thin arrows; e.g. Barry *et al.*, 2015; Dearborn *et al.*, 2012).  
123 In cluster analyses, this is called the “average linkage” between groups (Hair *et al.*,  
124 1998). This is an appealing method, providing measures of variation among dis-  
125 tances, and thus a t-test or equivalent can be used to test if differences are greater  
126 than a given threshold. The average linkage, however, is also inadequate because  
127 it conflates within- and among-group variation. This is because Euclidean dis-

128 tances (and by extension JND's) are *translation-invariant*: they ignore the position  
129 of points in colour space and the direction of the distance vectors, reflecting only  
130 the magnitude of differences between two points. Therefore, the average linkage  
131 reduces to a measure of spread, and will scale with both within- and between-  
132 group distances (Fig. 1, insert).

133 As these issues show, hypotheses of discriminability and colour-difference have  
134 primarily focused on testing whether the difference between samples is above a  
135 theoretical threshold. However, the convenience of such thresholds belies fact that  
136 simply comparing means between groups is not sufficient to infer, statistically,  
137 whether samples are different. To answer if two groups are different, one must  
138 compare the variation between- and within-groups. This is particularly problem-  
139 atic in the case of colours that function as signals in social interactions (e.g. [Kemp](#)  
140 [& Rutowski, 2011](#)). For a trait to function in this context, the observer must be  
141 able to tell signals of 'low' and 'high' quality apart. This means that, by defi-  
142 nition, *most pairs of individuals should be readily distinguishable*. The trait must be  
143 highly variable and colour distances should be above the threshold of discrimina-  
144 tion ([Delhey et al., 2017](#)), otherwise no information can be extracted by an observer  
145 comparing phenotypes.

146 Consider a hypothetical species that uses colour in mate choice, but is not sex-  
147 ually dichromatic (Fig. 1). In this species colour is highly variable and, on average,  
148 pairs of individuals are discriminable, but there is no *consistent* male-female dif-  
149 ference. Therefore, if a researcher sampled this species and calculated the average  
150 distance between all pairs of individuals, regardless of sex, these should be largely  
151 greater than 1 JND. However, if they took separate samples of males and females,  
152 then all pairwise distances (the average linkage) between sexes will be also greater  
153 than 1 JND, despite them being sampled from the same (statistical) population.

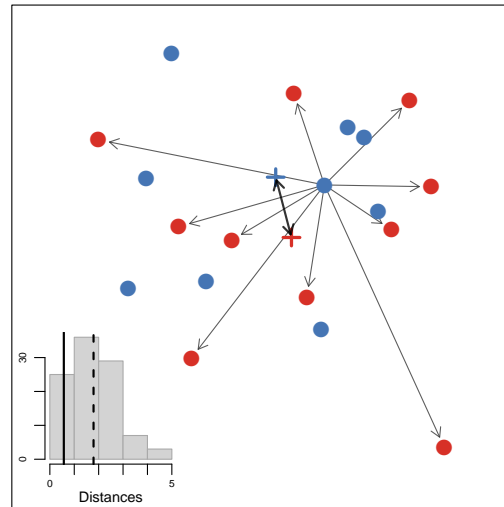

Figure 1: The link distance (i.e. average pairwise distance between groups) conflates within- and among-group variation. Here, two samples were drawn from the same simulated distribution. Thin arrows represent distances between a random point in the first sample (blue) and all points from the second sample (red), all of which are greater than the distance between the geometric means of the two samples (“x”, bold arrows). Inset shows the histogram of pairwise distances among groups, and how their average (dashed line) is greater than the mean distance (bold line).

154 *The limitations of current methods for comparing colour space distributions*

155 Several methods have been proposed to avoid the aforementioned issues by ac-  
156 counting for the relative distributions of samples in colour space. Eaton (2005),  
157 for example, noted that within-group variation influenced the conclusions on the  
158 extent of avian dichromatism, and thus tested for intersexual differences in pho-  
159 ton catches separately for each receptor. However, this ignores the multivariate  
160 nature of visual model data by failing to account for multiple comparisons and  
161 correlations among receptor catches (which are critical, since any  $n$ -receptor vi-  
162 sual system can be represented in  $n - 1$  dimensions; Kelber *et al.*, 2003).

163 An alternative, multivariate metric suggested by Stoddard & Prum (2008) is  
164 the volume overlap. In this approach, the volume occupied by a sample of colours  
165 is estimated from its enveloping convex hull, and separation between samples is



166 inferred from their overlap. [Stoddard & Stevens \(2011\)](#) used this metric to show  
167 that a greater overlap in colour volume between cuckoo and host eggs is associ-  
168 ated with lower rejection of parasitic eggs. This approach is appealing because it  
169 considers the distribution of colour points in multivariate space, though there are  
170 limits to its interpretation: (i) there is a lower bound to group separation (i.e. if  
171 samples do not overlap, there is no distinction between cases where samples are  
172 near or far apart) and (ii) it is unclear how variation in volume overlap should be  
173 interpreted biologically (e.g. how biologically relevant is the difference between  
174 20% or 40% overlap?). It is also particularly sensitive to outliers, because the vol-  
175 ume defined by a convex hull does not lend itself to a probabilistic interpretation,  
176 leading to the often unacknowledged assumption that the sampled data reflects  
177 the true boundaries of the population (however, “loose wrap” hypervolumetric  
178 methods exist; to our knowledge, these have not been applied to colour stud-  
179 ies; [Blonder \*et al.\*, 2017](#)). Finally, in its original implementation this method does  
180 not consider receptor noise or discrimination thresholds (but incorporating this is  
181 straightforward; see below).

182 The most robust attempt at comparing distributions of colours was proposed  
183 by [Endler & Mielke \(2005\)](#), who devised a non-parametric rank distance-based  
184 approach based on the least sum of Euclidean distances, compared through multi-  
185 response permutation procedures (LSED-MRPP). This multivariate approach is  
186 powerful because it calculates an effect size based on the relationship of between-  
187 and within-group distances. However, this single statistic captures differences be-  
188 tween samples not only in their means, but also in their dispersion and correlation  
189 structure (i.e. shape; [Endler & Mielke, 2005](#)). Like other distance-based methods,  
190 it is sensitive to confounding heterogeneity among samples when testing for dif-  
191 ferences in *location* ([Anderson & Walsh, 2013](#); [Warton \*et al.\*, 2012](#)). Despite its  
192 considerable strengths, this method has seen little adoption over the last decade,  
193 largely due to limitations in implementation and accessibility.

194 The shortcomings of these methods reflect the fundamental fact that the ques-

195 tion of discriminability actually represents a test of two hypotheses that are seldom  
196 formally distinguished: (i) that the focal samples are statistically distinct, and (ii)  
197 that the magnitude of their difference is greater than a psychophysical threshold  
198 of detection. Most approaches will test one, but not both, of these hypotheses  
199 through their respective nulls, and often with no estimate of variation or uncer-  
200 tainty in estimates. We explore these issues using a simulation-based approach  
201 by testing the efficacy of popular methods in detecting the separation of groups  
202 in colour space. We then propose a flexible solution that avoids these problems,  
203 demonstrating its utility using an example from the literature.

## 204 **Methods**

### 205 **Simulation procedures**

206 To compare methods for detecting group separation in colour space, we simu-  
207 lated data analogous to that obtained from applying an avian visual model to  
208 spectral reflectance data. Birds are tetrachromatic (Hart, 2001), and colours will  
209 thus be represented by the quantum catches of its four photoreceptors (though  
210 the procedure followed here can be applied to visual systems with any number  
211 of receptors). For each replicate, we simulated two samples defined by four vari-  
212 ables (*USML* photoreceptors) taken from log-normal distributions (since quantum  
213 catches are non-negative and noise-corrected distances follow a ratio scale, as de-  
214 fined by the Weber fraction, described above). We generated samples following  
215 two different scenarios: first, we simulated varying degrees of separation (i.e. ef-  
216 fect sizes) to evaluate the power and Type I error rates of the approaches tested.  
217 Second, we simulated threshold conditions to evaluate the performance of differ-  
218 ent approaches in correctly classifying whether samples are above-threshold.

219 For the first set of simulations (power and error-rates) we simulated the quantal  
220 catch of each photoreceptor  $i$  for the first sample (group A) by drawing from a log-  
221 normal distribution with mean  $\mu_{iA}$  seeded from a uniform distribution  $\mathcal{U}(0, 10)$ ,

222 and standard deviation proportional to the mean:  $\sigma_i = a_i \mu_{iA}$ , with  $a_i \sim \mathcal{U}(0, 0.5)$   
223 (note that, for these simulations,  $\mu$  and  $\sigma$  refer to the mean and standard deviation  
224 of the random variable itself, not in log scale). To generate two samples with  
225 varying degrees of separation proportional to the within-group variance, we used  
226 a multivariate effect size  $S$  obtained by calculating a constant  $d_i = \frac{S}{\sqrt{n}} \bar{\sigma}_i$ , where  $n$   
227 is the number of photoreceptors (in this case, 4) and  $\bar{\sigma}_i$  is the standard deviation  
228 of the sample. We then drew a second sample (group B) defined by  $\mu_{iB} = \mu_{iA} + d_i$   
229 and  $\sigma_i$ . Thus, our simulations effectively produced two samples with Mahalanobis  
230 Distance  $D_M \sim S$  (calculated as the distance between centroids of the two groups  
231 weighted by their pooled variance-covariance matrix). We simulated data for  $S =$   
232  $\{0, 0.1, 0.25, 0.5, 0.75, 1.0, 1.5, 2, 2.5, 3.0\}$  (Fig. 2), replicated 200 times for sample  
233 sizes  $N = \{10, 20, 50, 100\}$  each.

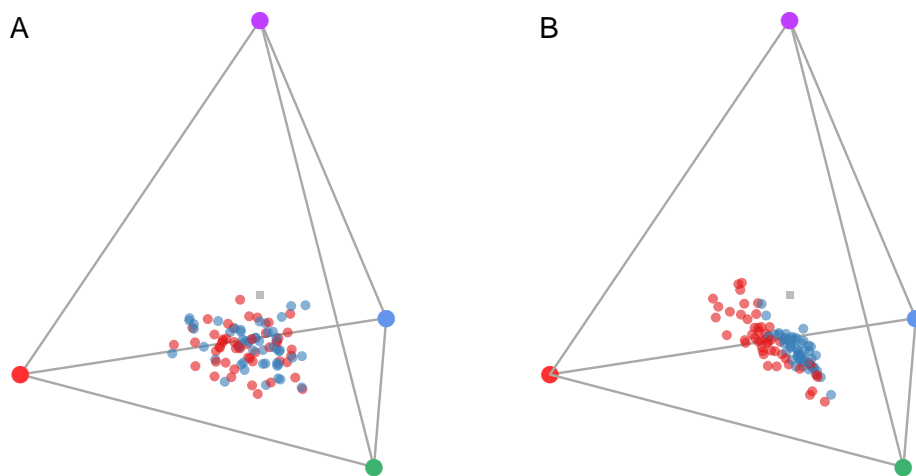

Figure 2: Example simulated data for the two groups (red, blue) in a tetrahedral colourspace. Shown here are data with sample size  $N = 50$  and effect size (A)  $S = 0$  and (B)  $S = 3$ .

234 For the second set of simulations (threshold conditions across a range of within-  
235 sample variation), we followed a similar procedure. Group A was sampled from a  
236 log-normal distribution with  $\mu_{iA} \sim \mathcal{U}(0, 10)$ , while  $\sigma_i$  was taken from an exponen-

237 tial distribution  $\sigma_i \sim \text{Exp}(\lambda = 1)$ . To obtain a second sample, group B, that was  
238 separated from group A with an average approximate distance of  $\sim 1$  JND given a  
239 Weber fraction of 0.1 for the long-wavelength photoreceptor (Vorobyev *et al.*, 1998),  
240 we drew from log-normal distributions with  $\mu_{iB} = d_i \mu_{iA}$ , where  $d_i \sim \mathcal{U}(0.88, 1.12)$ ,  
241 resulting in an average distance between geometric means (hereafter, “mean dis-  
242 tance”) of 1.11 (95% quantiles: 0.35 – 2.77 JND) and within-group average pairwise  
243 distance of 4.46 (95% quantiles: 1.03 – 11.10 JND) after 1000 replicates.

244 After the two groups were simulated, we used the R package *pavo* (Maia *et al.*,  
245 2013) to calculate colour distances using relative receptor densities of  $\{U, S, M, L\} =$   
246  $\{1, 2, 2, 4\}$  and Weber fraction for  $L = 0.1$ . We calculated the within-group average  
247 pairwise distance, as well as the distance between sample geometric means.

248 We then used four procedures to test for differences between groups. First,  
249 we used a distance-based PERMANOVA (hereafter “distance PERMANOVA”) us-  
250 ing the *adonis* function from the R package *vegan* (Oksanen *et al.*, 2007). This  
251 non-parametric approach uses distances to calculate a pseudo-F statistic, simulat-  
252 ing a null distribution by randomizing distances between observations (Anderson,  
253 2005). We recorded if the analysis was significant ( $\alpha = 0.05$ ) using 999 permuta-  
254 tions for the null, as well as the  $R^2$  as an effect size estimate. Second, we obtained  
255 XYZ Cartesian coordinates based on “perceptually-scaled” (i.e. noise-corrected)  
256 distances (Pike, 2012; functionally and mathematically equivalent to the receptor-  
257 noise limited space of de Ibarra *et al.*, 2001) and applied a MANOVA test on these  
258 coordinates (hereafter “Cartesian MANOVA”). For simplicity, we used a sum of  
259 squares and cross-products matrix approach and calculated Pillai’s trace and its  
260 associated P-value (but see discussion for extensions of this approach). Third, we  
261 calculated the volume overlap between the two samples (relative to their combined  
262 volumes) in a tetrahedral colour space defined by the receptors’ relative quantum  
263 catches (thus disregarding receptor noise; Stoddard & Prum, 2008). Finally, we  
264 calculated the volume overlap for the XYZ Cartesian coordinates based on noise-  
265 corrected distances, generating a colour volume overlap that accounts for receptor

266 noise.

## 267 **Simulation results**

### 268 **Power and error rates**

269 Both the distance PERMANOVA and the Cartesian MANOVA showed appropriate  
270 Type-I error rates, with about 5% of our simulations producing significant results  
271 when  $S = 0$ , even for small sample sizes (Fig. 3). As expected, the power to detect  
272 small effects steadily increased as a function of sample size, with the distance  
273 PERMANOVA being overall more conservative than the Cartesian MANOVA (Fig.  
274 3,4).

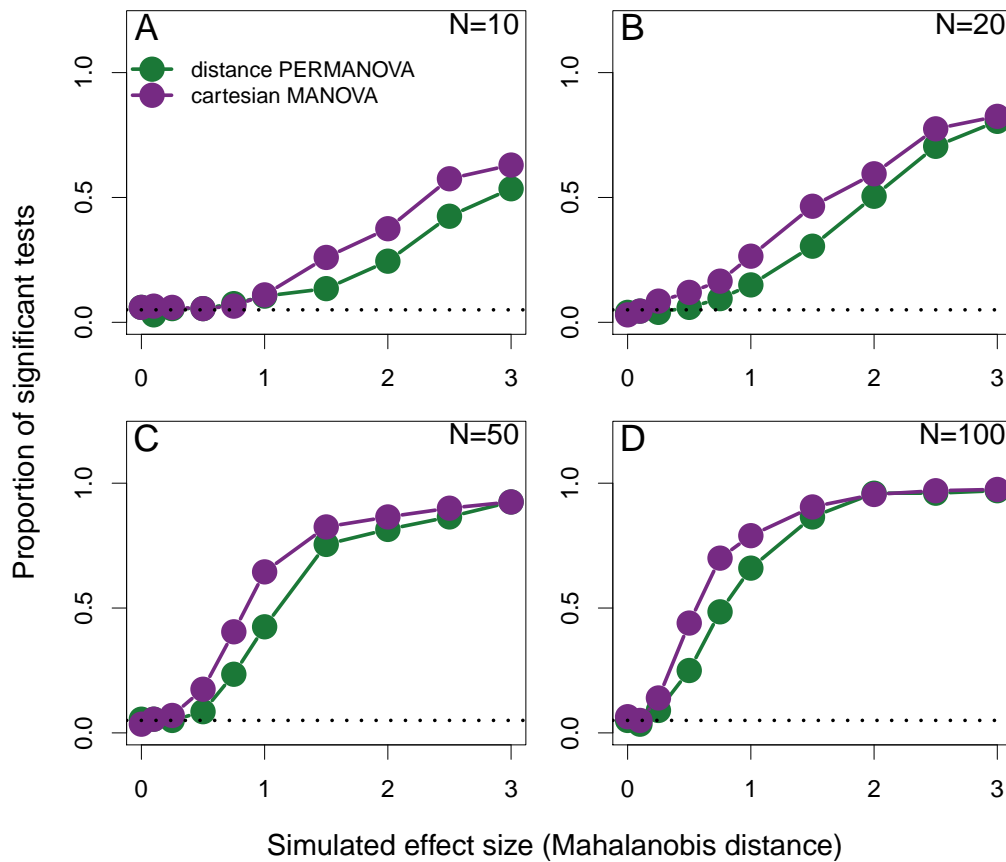

Figure 3: Power and Type I error rate of the distance PERMANOVA (green) and Cartesian MANOVA (purple). Panels show the proportion of simulations yielding significant results for each approach under different sample and effect sizes.

275 The two approaches showed some disagreement, with between 10 – 15% of  
276 the simulations significant only in one of the two tests (Fig. 4). This disagreement  
277 was not random, with the Cartesian MANOVA being more likely to be significant  
278 when the distance PERMANOVA was not than vice-versa (Fig. 4a), at an approx-  
279 imately constant rate across sample sizes, and disagreement being concentrated  
280 at smaller effect sizes with increasing sample sizes (Fig. 4b).

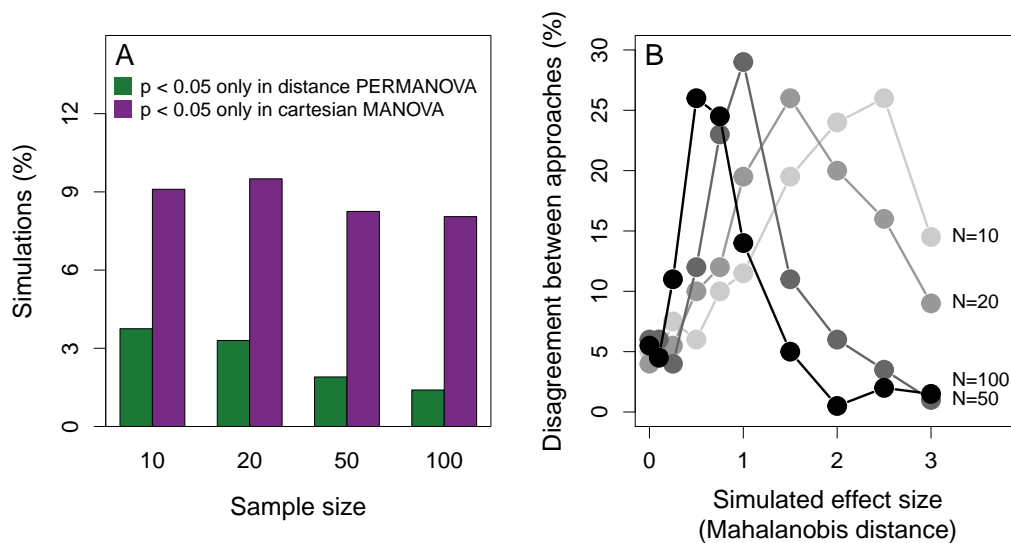

Figure 4: The disagreement between multivariate statistical approaches when testing for separation between samples in colour space in relation to sample size (A) and effect size (B).

281 Focusing on  $N = 50$  simulations, our results show that mean distance was  
282 positively associated with the effect size, and the threshold of significance using  
283 the distance PERMANOVA fell approximately at the  $1JND$  mark (Fig. 5A; equiv-  
284 alent results are observed with the Cartesian MANOVA, not shown). Still, even  
285 around that threshold, significance is variable, showing that large within-group  
286 variation can lead to non-significant differences between groups despite among-  
287 group distances being above the theoretical perceptual threshold. Volume overlap  
288 also showed a (negative) association with effect size, but no specific threshold  
289 for significance is observed (e.g. both significant and non-significant results are  
290 observed for 20 – 60% overlap; Figure 5B).

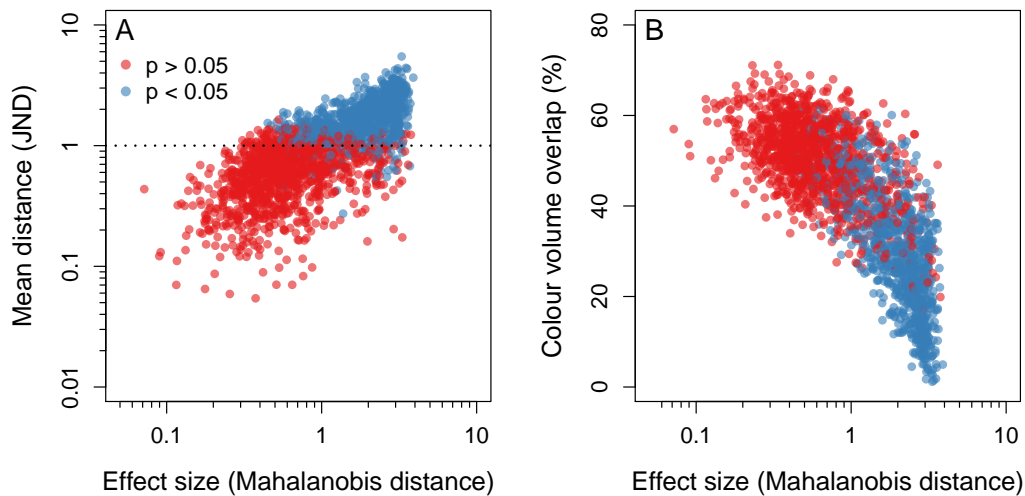

Figure 5: The association between effect size and (A) mean distance and (B) colour volume overlap. Significant distance PERMANOVA results are in blue, whereas non-significant results are in red. Dotted line indicates the threshold of 1 JND.

### 291 **Threshold scenarios**

292 Since results from the distance PERMANOVA and the Cartesian MANOVA were  
293 comparable, we focus on the former due to the convenience of the  $R^2$  statistic  
294 describing among-group separation (but see Discussion for comments on the use  
295 of these approaches). Simulations produced a wide range of outcomes, with non-  
296 significant and significant tests both above and below the theoretical threshold of 1  
297 JND (Fig. 6). In contrast with the power simulations above (Fig. 5), the significance  
298 threshold did not match the theoretical perceptual threshold. As in the hypothet-  
299 ical example from the introduction, 20.2% of the simulated cases were statistically  
300 indistinguishable despite having mean above-threshold distances (Fig. 6, dark  
301 red). Likewise, 15.1% of the simulations produced samples that were statistically  
302 different, but where this difference was below threshold and was therefore likely  
303 undetectable to its observer (Fig. 6, dark blue points). These results highlight the  
304 importance of considering both statistical separation and theoretical perceptual  
305 thresholds when testing the hypothesis that samples are discriminable.



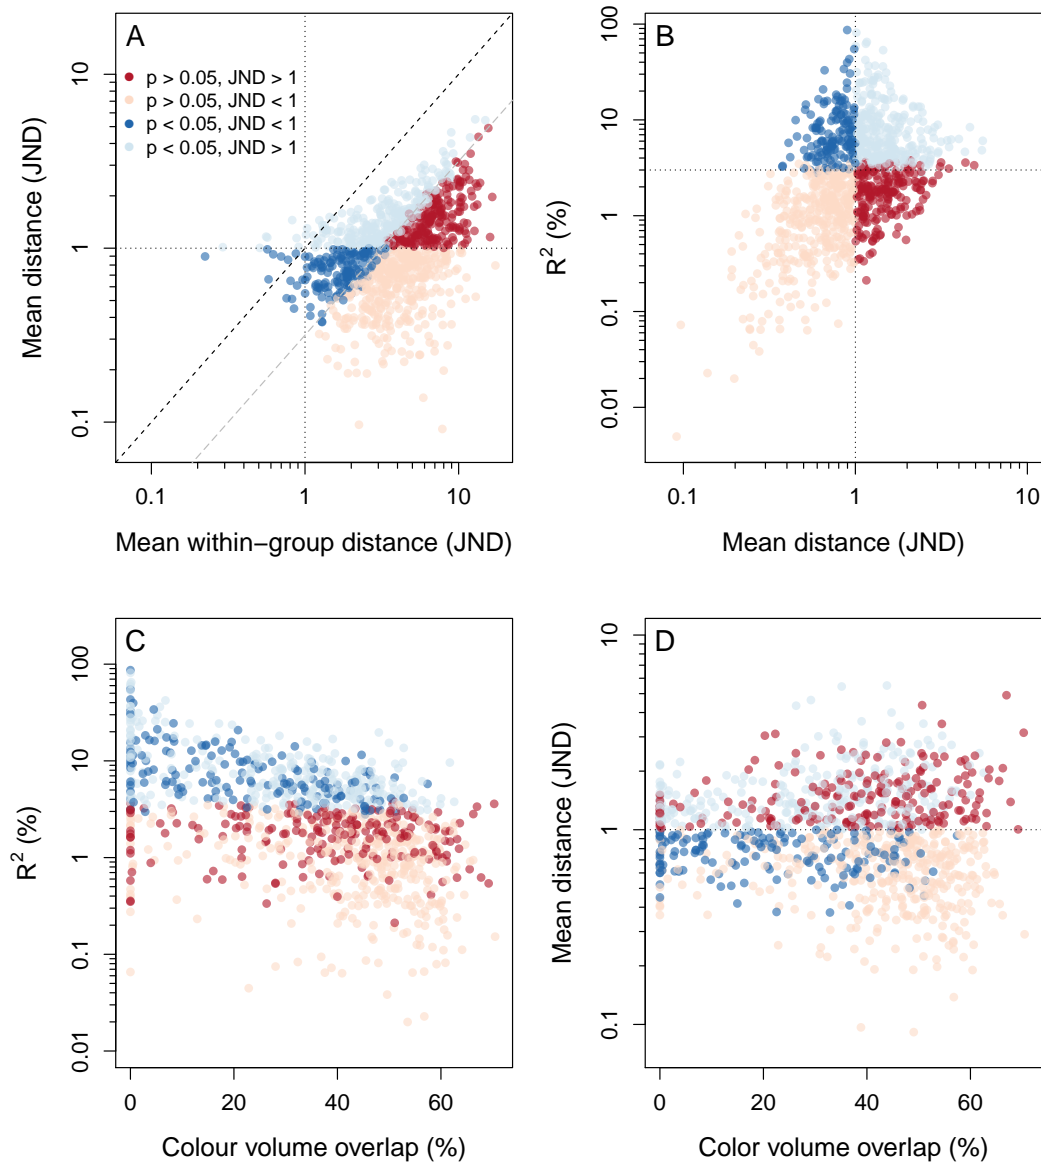

Figure 6: Results from threshold simulation. Red and blue denote non-significant and significant PERMANOVA tests, respectively, and light colours denote when that approach would yield the same inference as comparing mean distances to a threshold of 1JND. Thus, dark blue points indicate a significant statistical test that does not reach the threshold of discriminability of 1 JND, whereas dark red points indicate a non-significant statistical test that nonetheless has a mean distance greater than 1 JND.

306 Figure 6A shows that, intuitively, tests were significant when within-group  
307 differences were small relative to among-group differences. However, nearly all  
308 simulations — including most significant results — fell below the 1:1 line when

309 using the average link distance (i.e. the average pairwise distance) to describe  
310 intragroup variation. Significant results are obtained when the mean difference is  
311 up to 0.5 JND smaller than the within-group average link distance (Fig. 6A, grey  
312 line intercept). Similarly, we can see that significant results can be obtained for  
313 fairly low levels of among-group separation, with  $R^2$  as small as 3 or 4% (Fig. 6B,  
314 horizontal line at 3%).

315 Though there is a negative association between  $R^2$  and volume overlap (Fig.  
316 6C), results show low overall consistency between approaches: for any given value  
317 of volume overlap, all possible outcomes of significance/threshold occur — even  
318 when the overlap between samples is zero (Fig. 6C). In other words, even complete  
319 separation in colour volumes can result in non-significant, below-threshold cases,  
320 since samples can be contiguous without overlapping in noise-corrected colour  
321 space. Likewise, samples can have high overlap but be entirely distinguishable  
322 statistically and perceptually. Further, there is no association between volume  
323 overlap and mean distance between groups (Fig. 6D). These results were unaltered  
324 by considering receptor noise in the volume overlap calculation, since these are  
325 still strongly and positively correlated with their non-noise-corrected counterparts  
326 (Electronic Supplementary Material).

### 327 **A two-step approach to estimate statistical and perceptual separation**

328 As described previously, questions of discriminability and colour-difference re-  
329 quire testing two distinct hypotheses: if samples are (i) statistically and (ii) ‘percep-  
330 tually’ distinct. We therefore propose a two-step answer to such questions, which  
331 explicitly formalizes these hypotheses. For the first question — are the samples  
332 *statistically separate* in colour space? — we show that both a PERMANOVA us-  
333 ing noise-corrected colour distances (Anderson, 2005; Cornuault *et al.*, 2015), and  
334 a MANOVA using noise-calibrated Cartesian coordinates (de Ibarra *et al.*, 2001;  
335 Delhey *et al.*, 2015; Pike, 2012) are well suited. Both exclude achromatic variation  
336 and properly account for the multivariate nature of the data. There is also mini-

337 mal discrepancy between the two (Fig. 3,4), so the decision between them may be  
338 informed by convenience and the structure of the data at hand.

339 Once the separation of samples is established statistically, a second question  
340 must be answered: is this separation predicted to be *perceptually discriminable*? The  
341 statistics calculated above cannot answer this, since effect sizes account for both  
342 among- and within-group variance. We therefore suggest this be tested indepen-  
343 dently, by estimating the distance in colour space between group geometric means  
344 rather than through the average pairwise distance or volume-overlap based met-  
345 rics, which fail to accurately estimate group separation (Figs. 1,6). One limitation  
346 to this statistic is the lack of any measure of uncertainty. To circumvent that, we  
347 suggest a bootstrap procedure in which new samples are produced through re-  
348 sampling (with replacement) of individuals of each group, from which geometric  
349 means and their distance are calculated. Repeating this procedure generates a dis-  
350 tribution of mean distances, from which a confidence interval can be estimated. If  
351 the groups being compared are statistically different and this bootstrapped con-  
352 fidence interval does not include the theoretical threshold of adequate biological  
353 significance, one can conclude that the samples being compared are distinct and  
354 likely discriminable.

### 355 **Empirical example: Sexual dichromatism in the leaf-nosed** 356 **lizard *Ceratophora tennentii***

357 Visually signalling animals often use distinct body parts for different purposes,  
358 such as social signalling to mates or warning predators (Barry *et al.*, 2015; Grether  
359 *et al.*, 2004; Johnstone, 1995). The nature of intraspecific variation in colour can  
360 thus inform their putative function, since selection may act differentially on signals  
361 used in different contexts. For example, traits subject to strong sexual selection in  
362 one of the sexes are often dimorphic, with one sex (typically males) expressing a  
363 conspicuous colour pattern that is reduced or absent in the other (Bell & Zamudio,

364 2012; Kemp & Rutowski, 2011).

365 Dragon lizards (Agamidae) are known for variable colouration used in both  
366 social and anti-predator contexts (Johnston *et al.*, 2013; Somaweera & Somaweera,  
367 2009). The leaf-nosed lizard *Ceratophora tennentii* has multiple discrete colour  
368 patches, with apparent sex differences between body parts (Fig. 7). Here we  
369 draw on the data of Whiting *et al.* (2015), who recorded the spectral reflectance of  
370 29 male and 27 female *C. tennentii* from four body regions (throat, labials, mouth-  
371 roof, and tongue). We used a tetrachromatic model of agamid vision to test for  
372 dichromatism among body regions from the perspective of conspecifics.

373 Following standard calculations for the log-linear receptor-noise model, we  
374 used the spectral sensitivity of *Ctenophorus ornatus* ( $\lambda_{max} = 360, 440, 493, 571$  nm)  
375 as modelled according to a vitamin A1 template (Barbour *et al.*, 2002; Govardovskii  
376 *et al.*, 2000). We assumed a relative photoreceptor abundance of 1 : 1 : 3.5 : 6,  
377 and a coefficient of variation of noise yielding a Weber fraction of 0.1 for the  
378 long-wavelength cone (Fleishman *et al.*, 2011; Loew *et al.*, 2002). We tested each  
379 body region separately using PERMANOVA. As above, we used the R package  
380 pavo for visual modelling, and the adonis function in the R package vegan for  
381 PERMANOVAs.

382 We found a statistical difference between male and female throats (PERMANOVA:  
383  $F_{1,58} = 14.84$ ,  $P < 0.01$ ) and labials ( $F_{1,57} = 13.96$ ,  $P < 0.01$ ; Fig. 7A,B), but not for  
384 tongues ( $F_{1,58} = 1.63$ ,  $P = 0.22$ ) or mouth-roofs ( $F_{1,55} = 0.52$ ,  $P = 0.50$ ; Fig. 7C,D).  
385 However, bootstraps of group separation suggest that intersexual differences in  
386 labial colour are likely imperceptible to conspecifics (Fig. 7E; though like all such  
387 predictions this requires behavioural validation). Our results therefore suggest  
388 the absence of dichromatism in all but throat colour from the lizard perspective,  
389 despite statistical significance for the labial region. These results thus do not im-  
390 plicate sexual selection as a strong driver of intersexual colour differences in these  
391 few body regions of *C. ornatus*.

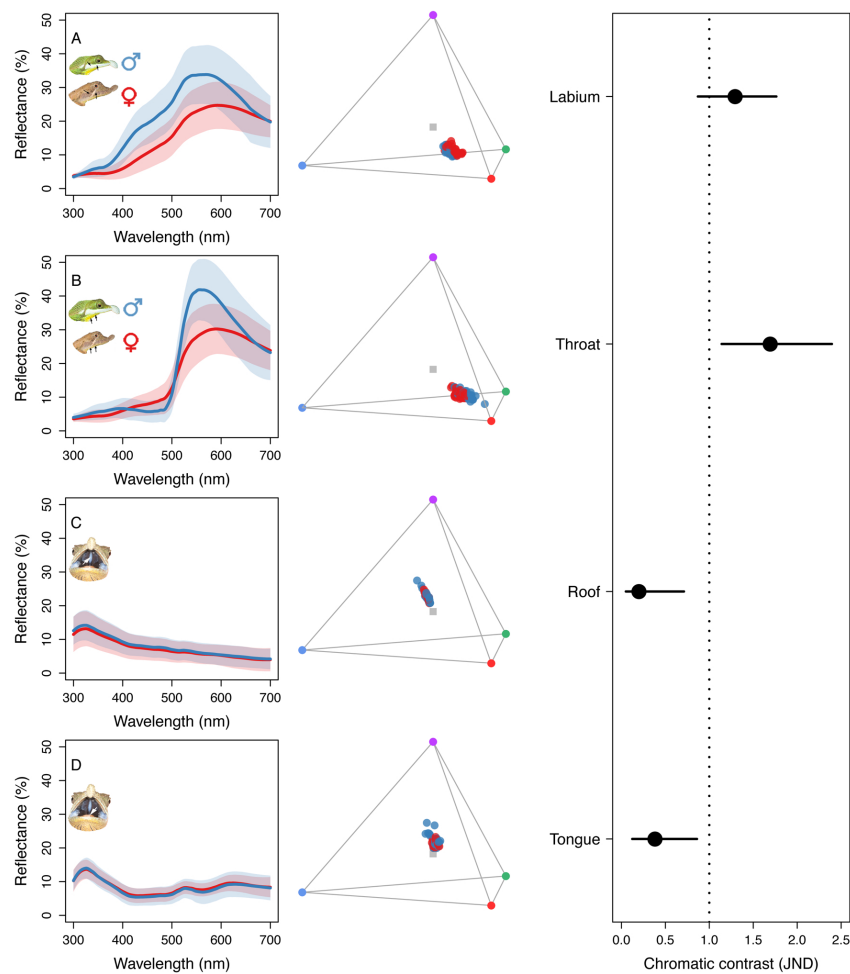

Figure 7: The mean ( $\pm$  SD) spectral reflectance of female (red) and male (black) (A) labial, (B) throat, (C) mouth-roof, and (D) tongue (left panels), and their colourspace distribution according in a tetrachromatic model of agamid vision (middle panels). Inset images indicate approximate sampling regions. The bootstrapped 95 % C.I.'s for mean distances between groups in colour space (right panels). Partly reproduced, with permission, from [Whiting \*et al.\* 2015](#).

## 392 Discussion

393 Visual models offer a useful tool for quantifying the subjective perception of  
 394 colour, which — as the ultimate canvas for colour-signal evolution — can offer  
 395 valuable insight into a breadth of biological phenomena. It is therefore essential  
 396 that statistical considerations of biological hypotheses take into account both nat-  
 397 ural variation in the compared samples as well as the limits to observer perception  
 398 (as ultimately informed by behavioural and physiological data; [Kemp \*et al.\*, 2015](#)).

399 Here, we show that most methods typically fail to consider these aspects, and pro-  
400 pose a flexible alternative that explicitly addresses both.

401 The use of models that do not explicitly consider discriminability, such as  
402 the volume-overlap and segment-based analyses, is often justified on the basis of  
403 simplifying and relaxing assumptions about colour perception, since intricate em-  
404 pirical work is required to estimate model parameters (Kelber *et al.*, 2017; Olsson  
405 *et al.*, 2015; Vorobyev & Osorio, 1998). However, we contend that, on the contrary,  
406 some of these ‘simpler’ methods actually make very strong latent assumptions,  
407 which are not supported by the empirical evidence. This includes the assumption  
408 that all cones contribute equally to colour perception, that colour discrimination is  
409 unequivocal (i.e. the magnitude of colour-difference does not affect discriminabil-  
410 ity) and that colour differences follow an interval scale (as opposed to a ratio scale).  
411 Thus, we suggest that considering detectability relative to a threshold is essential  
412 for tests of discriminability. We emphasise, however, that this does not necessitate  
413 the use of the receptor-noise model specifically. Although we have focused on this  
414 popular approach here, particularly due to its utility for non-model organisms, a  
415 breadth of available modelling tools are capable of offering similar, and in some  
416 cases superior, insight (Kemp *et al.*, 2015; Price & Fialko, 2017; Renoult *et al.*, 2017).  
417 The hexagon model of Chittka (1992), for example, has been extensively tested  
418 and validated in honeybees, and may outperform the receptor-noise model when  
419 suitably parameterised (Garcia *et al.*, 2017). It too offers a psychophysiologically-  
420 informed measure of perceptual distance, as well as discrimination thresholds,  
421 and so may be readily applied within our suggested framework. The two-step  
422 approach we propose can be easily and directly extended to these models.

423 Our simulations show that both the distance PERMANOVA and Cartesian  
424 MANOVA perform similarly well in statistically differentiating colours in percep-  
425 tual space (Fig. 3). Studies have pointed out that distance-based methods perform  
426 poorly when the experimental design is unbalanced or when there is heteroscedas-  
427 ticity (though, among distance-based methods, PERMANOVA outperforms other

428 approaches; Anderson & Walsh, 2013; Warton *et al.*, 2012). It is important to note  
429 that these are often common features of, and applicable to, colour data (Endler  
430 & Mielke, 2005), and that these assumptions should be considered and verified.  
431 However, this might still be the most robust option for high-dimensional visual  
432 systems (e.g. Arikawa *et al.*, 1987; Cronin & Marshall, 1989), by reducing data  
433 to a single metric of distance. Recently, Delhey *et al.* (2015) advocated a similar  
434 MANOVA approach, by applying a Principal Component Analysis (PCA) to the  
435 noise-corrected Cartesian coordinates prior to the test. However, if all the princi-  
436 pal components are used in the MANOVA, results will be numerically identical to  
437 directly using the XYZ coordinates (which is preferable, since it is often tempting  
438 to discard PC axes of low variance, which could be problematic given that those  
439 axes may be involved in group differentiation). While we have focused on tests  
440 of differences in the location of colours in colour space, we recognise that other  
441 characteristics — such as differences in dispersion and correlation structure, and  
442 to identify the direction of variation among groups — might themselves be of  
443 biological interest, for which a PCA approach may be particularly useful.

444 The MANOVA approach can be extended to multivariate generalizations of  
445 generalized linear models by using the noise-corrected Cartesian coordinates as  
446 response variables (Hadfield, 2010). These models can also relax the assumptions  
447 of heteroscedasticity by estimating the variance-covariance of the responses (Had-  
448 field, 2010), and can be extended to include various error and model structures,  
449 such as hierarchical and phylogenetic models (Hadfield & Nakagawa, 2010). Still,  
450 these approaches will only test for the statistical separation in colour space, so  
451 estimating the magnitude of that separation is still necessary. The bootstrapped  
452 distance provides an easy to interpret measure of uncertainty to the mean dis-  
453 tance estimate. Under a Bayesian approach, the mean distance bootstrap can be  
454 substituted by estimating credible intervals for the distance between perceptually-  
455 corrected Cartesian centroids from the posterior distribution, though this will be  
456 influenced by the priors adopted (Hadfield, 2010, see Electronic Supplementary



457 Material for an example analysis).

458 Irrespective of the method used, it is essential to parametrize the underly-  
459 ing visual model appropriately (Garcia *et al.*, 2017; Olsson *et al.*, 2017). The Weber  
460 fraction and receptor densities chosen will strongly affect noise-corrected distances  
461 since they directly scale with the JND unit (Bitton *et al.*, 2017). Further, even under  
462 adequate values of the Weber fraction it is important to realize that the unit JND  
463 usually reflects psychophysical performance under extremely controlled condi-  
464 tions (Kelber *et al.*, 2003; Olsson *et al.*, 2015), and that more conservative estimates  
465 of 2-4+ JND may be more appropriate for ecological and evolutionary questions  
466 (Osorio *et al.*, 2004; Schaefer *et al.*, 2007). Sensitivity analyses are also useful for  
467 exploring the robustness of conclusions against parameter variation, particularly  
468 in the case of non-model systems where such values are often assumed or drawn  
469 from related species (Bitton *et al.*, 2017; Olsson *et al.*, 2017). More broadly, we af-  
470 firm recent (and ongoing) calls for pragmatism when drawing inferences from  
471 any such model (Marshall & Simmons, 2017; Olsson *et al.*, 2017; Vasas *et al.*, 2017).  
472 Colour spaces are valuable tools, but ultimately demand ongoing feedback from  
473 physiological and behavioural tests to improve our understanding of complex bi-  
474 ological phenomena.

475 Our results show that insight into the biology of colour and its role in commu-  
476 nication is best achieved by disentangling the implicit assumptions in questions  
477 of discriminability. By bringing these assumptions to light, our two-step approach  
478 offers a flexible procedure for examining the statistical presence and theoretical  
479 magnitude of differences between colour samples. We expect it will bring exciting  
480 new perspectives on the role of colour in intra- and interspecific interactions, and  
481 provide an efficient analytical framework for the study of colour in nature.



## 482 **Implementation and data accessibility**

483 Analyses and simulations can be found in <https://github.com/rmaia/msdichromatism/>,  
484 and the described methods are fully implemented in the R package `pavo` as of ver-  
485 sion 1.3.1, available via CRAN. Key functions include `bootcoldist` which calcu-  
486 lates the bootstrapped confidence intervals for mean distances, while `jnd2xyz`  
487 converts chromatic distances in JNDs to noise-corrected Cartesian coordinates  
488 . Multi-dimensional plotting options for noise-converted coordinates are also  
489 available. Lizard colour data from Whiting *et al.* 2015 are available at [http:](http://dx.doi.org/10.6084/m9.figshare.1452908)  
490 [//dx.doi.org/10.6084/m9.figshare.1452908](http://dx.doi.org/10.6084/m9.figshare.1452908).

## 491 **Acknowledgments**

492 We would like to thank Ruchira Somaweera for leaf-nosed lizard photographs,  
493 and Dan Noble, John Endler and two anonymous reviewers for valuable discus-  
494 sion and comments on earlier drafts of the manuscript. This work was partially  
495 supported by a Junior Fellow award from the Simons Foundation to R.M., and an  
496 Australian Research Council grant (DP140140107) to T.E.W.

## 497 **Author contributions**

498 RM and TEW conceived the ideas, designed methodology, analysed the data, and  
499 wrote the manuscript.

## 500 **References**

- 501 Anderson, M.J. (2005) Permutational multivariate analysis of variance. *Department*  
502 *of Statistics, University of Auckland, Auckland*, **26**, 32–46.
- 503 Anderson, M.J. & Walsh, D.C. (2013) Permanova, anosim, and the mantel test in  
504 the face of heterogeneous dispersions: what null hypothesis are you testing?  
505 *Ecological Monographs*, **83**(4), 557–574.
- 506 Arikawa, K., Inokuma, K. & Eguchi, E. (1987) Pentachromatic visual system in a  
507 butterfly. *Naturwissenschaften*, **74**(6), 297–298.
- 508 Avilés, J.M., Soler, J.J. & Hart, N.S. (2011) Sexual selection based on egg colour:  
509 physiological models and egg discrimination experiments in a cavity-nesting  
510 bird. *Behavioral Ecology and Sociobiology*, **65**(9), 1721–1730.
- 511 Barbour, H.R., Archer, M.A., Hart, N.S., Thomas, N., Dunlop, S.A., Beazley, L.D. &  
512 Shand, J. (2002) Retinal characteristics of the ornate dragon lizard, *ctenophorus*  
513 *ornatus*. *Journal of Comparative Neurology*, **450**(4), 334–344.
- 514 Barry, K.L., White, T.E., Rathnayake, D.N., Fabricant, S.A. & Herberstein, M.E.  
515 (2015) Sexual signals for the colour-blind: cryptic female mantids signal quality  
516 through brightness. *Functional Ecology*, **29**(4), 531–539.
- 517 Bell, R.C. & Zamudio, K.R. (2012) Sexual dichromatism in frogs: natural selec-  
518 tion, sexual selection and unexpected diversity. *Proceedings of the Royal Society of*  
519 *London B: Biological Sciences*, rspb20121609.
- 520 Bitton, P.P., Janisse, K. & Doucet, S.M. (2017) Assessing sexual dicromatism: The  
521 importance of proper parameterization in tetrachromatic visual models. *PLOS*  
522 *ONE*, **12**(1), 1–22.
- 523 Blonder, B., Babich Morrow, C., Maitner, B., Harris, D.J., Lamanna, C., Violle,  
524 C., Enquist, B.J. & Kerkhoff, A.J. (2017) New approaches for delineating n-  
525 dimensional hypervolumes. *Methods in Ecology and Evolution*, n/a–n/a.

- 526 Burns, K.J. & Shultz, A.J. (2012) Widespread cryptic dichromatism and ultraviolet  
527 reflectance in the largest radiation of neotropical songbirds: implications of ac-  
528 counting for avian vision in the study of plumage evolution . *The Auk*, **129**(2),  
529 211–221.
- 530 Cardoso, G.C. & Gomes, A.C.R. (2015) Using reflectance ratios to study animal  
531 coloration. *Evolutionary Biology*, **42**(3), 387–394.
- 532 Chittka, L. (1992) The colour hexagon: a chromaticity diagram based on photore-  
533 ceptor excitations as a generalized representation of colour opponency. *Journal*  
534 *of Comparative Physiology A*, **170**(5), 533–543.
- 535 Clark, R.C., Santer, R.D. & Brebner, J.S. (2017) A generalized equation for  
536 the calculation of receptor noise limited colour distances in n-chromatic  
537 visual systems. *Royal Society Open Science*, **4**(9), doi:10.1098/rsos.170712,  
538 URL <http://rsos.royalsocietypublishing.org/content/4/9/170712>. <http://rsos.royalsocietypublishing.org/content/4/9/170712.full.pdf>.
- 540 Cornuault, J., Delahaie, B., Bertrand, J.A.M., Bourgeois, Y.X.C., Milã, B., Heeb,  
541 P. & Thälbaud, C. (2015) Morphological and plumage colour variation in the  
542 Réunion grey white-eye (aves: *Zosterops borbonicus*): assessing the role of  
543 selection. *Biological Journal of the Linnean Society*, **114**(2), 459–473.
- 544 Cronin, T.W. & Marshall, N.J. (1989) A retina with at least ten spectral types of  
545 photoreceptors in a mantis shrimp. *Nature*, **339**(6220), 137–140.
- 546 Cuthill, I.C., Allen, W.L., Arbuckle, K., Caspers, B., Chaplin, G., Hauber, M.E.,  
547 Hill, G.E., Jablonski, N.G., Jiggins, C.D., Kelber, A., Mappes, J., Marshall, J.,  
548 Merrill, R., Osorio, D., Prum, R., Roberts, N.W., Roulin, A., Rowland, H.M.,  
549 Sherratt, T.N., Skelhorn, J., Speed, M.P., Stevens, M., Stoddard, M.C., Stuart-Fox,  
550 D., Talas, L., Tibbetts, E. & Caro, T. (2017) The biology of color. *Science*, **357**(6350).
- 551 de Ibarra, N.H., Giurfa, M. & Vorobyev, M. (2001) Detection of coloured patterns

- 552 by honeybees through chromatic and achromatic cues. *Journal of Comparative*  
553 *Physiology A*, **187**(3), 215–224.
- 554 Dearborn, D.C., Hanley, D., Ballantine, K., Cullum, J. & Reeder, D.M. (2012)  
555 Eggshell colour is more strongly affected by maternal identity than by dietary  
556 antioxidants in a captive poultry system. *Functional Ecology*, **26**(4), 912–920.
- 557 Delhey, K., Delhey, V., Kempenaers, B. & Peters, A. (2015) A practical framework  
558 to analyze variation in animal colors using visual models. *Behavioral Ecology*,  
559 **26**(2), 367–375.
- 560 Delhey, K. & Peters, A. (2008) Quantifying variability of avian colours: are sig-  
561 nalling traits more variable? *PLoS One*, **3**(2), e1689.
- 562 Delhey, K., Szecsenyi, B., Nakagawa, S. & Peters, A. (2017) Conspicuous plumage  
563 colours are highly variable. *Proceedings of the Royal Society of London B: Biological*  
564 *Sciences*, **284**(1847).
- 565 Dyer, A.G. & Neumeyer, C. (2005) Simultaneous and successive colour discrimina-  
566 tion in the honeybee (*apis mellifera*). *Journal of Comparative Physiology A*, **191**(6),  
567 547–557.
- 568 Eaton, M.D. (2005) Human vision fails to distinguish widespread sexual dichroma-  
569 tism among sexually “monochromatic” birds. *Proceedings of the National Academy*  
570 *of Sciences of the United States of America*, **102**(31), 10942–10946.
- 571 Endler, J.A. & Mielke, P.W. (2005) Comparing entire colour patterns as birds see  
572 them. *Biological Journal of the Linnean Society*, **86**(4), 405–431.
- 573 Fleishman, L.J., Loew, E.R. & Whiting, M.J. (2011) High sensitivity to short wave-  
574 lengths in a lizard and implications for understanding the evolution of visual  
575 systems in lizards. *Proceedings of the Royal Society of London B: Biological Sciences*,  
576 **278**(1720), 2891–2899.

- 577 Garcia, J.E., Greentree, A.D., Shrestha, M., Dorin, A. & Dyer, A.G. (2014) Flower  
578 colours through the lens: Quantitative measurement with visible and ultraviolet  
579 digital photography. *PloS one*, **9**(5), e96646.
- 580 Garcia, J.E., Spaethe, J. & Dyer, A.G. (2017) The path to colour discrimination is  
581 s-shaped: behaviour determines the interpretation of colour models. *Journal of*  
582 *Comparative Physiology A*, 1–15.
- 583 Govardovskii, V.I., Fyhrquist, N., Reuter, T., Kuzmin, D.G. & Donner, K. (2000) In  
584 search of the visual pigment template. *Visual neuroscience*, **17**(04), 509–528.
- 585 Grether, G.F., Kolluru, G.R. & Nersissian, K. (2004) Individual colour patches as  
586 multicomponent signals. *Biological Reviews*, **79**(03), 583–610.
- 587 Hadfield, J.D. & Nakagawa, S. (2010) General quantitative genetic methods for  
588 comparative biology: phylogenies, taxonomies and multi-trait models for con-  
589 tinuous and categorical characters. *Journal of Evolutionary Biology*, **23**(3), 494–508.
- 590 Hadfield, J. (2010) Mcmc methods for multi-response generalized linear mixed  
591 models: The mcmcglmm r package. *Journal of Statistical Software, Articles*, **33**(2),  
592 1–22, doi:10.18637/jss.v033.i02, URL <https://www.jstatsoft.org/v033/i02>.
- 593 Hair, J.F., Black, W.C., Babin, B.J., Anderson, R.E., Tatham, R.L. *et al.* (1998) *Multi-*  
594 *variate data analysis*, vol. 5. Prentice hall Upper Saddle River, NJ.
- 595 Hart, N.S. (2001) The visual ecology of avian photoreceptors. *Progress in retinal and*  
596 *eye research*, **20**(5), 675–703.
- 597 Johnsen, S. (2016) How to measure color using spectrometers and calibrated pho-  
598 tographs. *Journal of Experimental Biology*, **219**(6), 772–778.
- 599 Johnston, G., Lee, M. & Surasinghe, T. (2013) Morphology and allometry suggest  
600 multiple origins of rostral appendages in sri lankan agamid lizards. *Journal of*  
601 *Zoology*, **289**(1), 1–9.

- 602 Johnstone, R.A. (1995) Honest advertisement of multiple qualities using multiple  
603 signals. *Journal of theoretical Biology*, **177**(1), 87–94.
- 604 Kelber, A., Vorobyev, M. & Osorio, D. (2003) Animal colour vision—behavioural  
605 tests and physiological concepts. *Biological Reviews*, **78**(01), 81–118.
- 606 Kelber, A., Yovanovich, C. & Olsson, P. (2017) Thresholds and noise limitations of  
607 colour vision in dim light. *Phil. Trans. R. Soc. B*, **372**(1717), 20160065.
- 608 Kemp, D.J., Herberstein, M.E., Fleishman, L.J., Endler, J.A., Bennett, A.T.D., Dyer,  
609 A.G., Hart, N.S., Marshall, J. & Whiting, M.J. (2015) An integrative framework  
610 for the appraisal of coloration in nature. *The American Naturalist*, **185**, 705–724.
- 611 Kemp, D.J. & Rutowski, R.L. (2011) The role of coloration in mate choice and  
612 sexual interactions in butterflies. *Advances in the Study of Behavior*, **43**(5).
- 613 Loew, E.R., Fleishman, L.J., Foster, R.G. & Provencio, I. (2002) Visual pigments and  
614 oil droplets in diurnal lizards. *Journal of Experimental Biology*, **205**(7), 927–938.
- 615 Maia, R., Eliason, C.M., Bitton, P.P., Doucet, S.M. & Shawkey, M.D. (2013) pavo:  
616 an r package for the analysis, visualization and organization of spectral data.  
617 *Methods in Ecology and Evolution*, 906–913.
- 618 Maia, R., Rubenstein, D.R. & Shawkey, M.D. (2016) Selection, constraint, and the  
619 evolution of coloration in african starlings. *Evolution*, **70**(5), 1064–1079, doi:10.  
620 1111/evo.12912, URL <http://dx.doi.org/10.1111/evo.12912>.
- 621 Maier, E. (1992) Spectral sensitivities including the ultraviolet of the passeriform  
622 bird *leiothrix lutea*. *Journal of Comparative Physiology A*, **170**(6), 709–714.
- 623 Marshall, J. & Simmons, L. (2017) Do not be distracted by pretty colors: a comment  
624 on olsson et al. *Behavioral Ecology*.
- 625 Nathans, J. (1999) The evolution and physiology of human color vision: insights  
626 from molecular genetic studies of visual pigments. *Neuron*, **24**(2), 299–312.

- 627 O'Hanlon, J.C., Holwell, G.I. & Herberstein, M.E. (2014) Predatory pollinator de-  
628 ception: Does the orchid mantis resemble a model species? *Current Zoology*,  
629 **60**(1).
- 630 Oksanen, J., Kindt, R., Legendre, P., O'Hara, B., Stevens, M.H.H., Oksanen,  
631 M.J. & Suggests, M. (2007) The vegan package. *Community ecology package*, **10**,  
632 631–637.
- 633 Olsson, P., Lind, O. & Kelber, A. (2015) Bird colour vision: behavioural thresholds  
634 reveal receptor noise. *Journal of Experimental Biology*, **218**(2), 184–193.
- 635 Olsson, P., Lind, O., Kelber, A. & Simmons, L. (2017) Chromatic and achromatic vi-  
636 sion: parameter choice and limitations for reliable model predictions. *Behavioral*  
637 *Ecology*.
- 638 Osorio, D., Smith, A.C., Vorobyev, M. & Buchanan-Smith, H.M. (2004) Detection of  
639 fruit and the selection of primate visual pigments for color vision. *The American*  
640 *Naturalist*, **164**(6), 696–708.
- 641 Pessoa, D.M.A., Maia, R., de Albuquerque Ajuz, R.C., De Moraes, P.Z.P.M.,  
642 Spyrides, M.H.C., Pessoa, V.F. *et al.* (2014) The adaptive value of primate color  
643 vision for predator detection. *American journal of primatology*, **76**(8), 721–729.
- 644 Pike, T.W. (2012) Preserving perceptual distances in chromaticity diagrams. *Behav-*  
645 *ioral Ecology*, **23**(4), 723–728.
- 646 Price, T. & Fialko, K. (2017) Receptor noise models: time to consider alternatives?:  
647 a comment on olsson et al. *Behavioral Ecology*, **Advanced Articles**, arx155.
- 648 Renoult, J.P., Kelber, A. & Schaefer, H.M. (2017) Colour spaces in ecology and  
649 evolutionary biology. *Biological Reviews*, **92**(1), 292–315.
- 650 Rheindt, F.E., Fujita, M.K., Wilton, P.R. & Edwards, S.V. (2014) Introgression and  
651 phenotypic assimilation in zimmerius flycatchers (tyrannidae): Population ge-

- 652 netic and phylogenetic inferences from genome-wide snps. *Systematic Biology*,  
653 **63**(2), 134–152.
- 654 Schaefer, H., Schaefer, V. & Vorobyev, M. (2007) Are fruit colors adapted to con-  
655 sumer vision and birds equally efficient in detecting colorful signals? *The Amer-  
656 ican Naturalist*, **169**(S1), S159–S169. PMID: 19426090.
- 657 Schultz, T.D. & Fincke, O.M. (2013) Lost in the crowd or hidden in the grass: sig-  
658 nal apparency of female polymorphic damselflies in alternative habitats. *Animal  
659 behaviour*, **86**(5), 923–931.
- 660 Somaweera, R. & Somaweera, N. (2009) *Lizards of Sri Lanka: a colour guide with field  
661 keys*. Andreas S. Brahm.
- 662 Stoddard, M.C. & Prum, R.O. (2008) Evolution of avian plumage color in a tetra-  
663 hedral color space: a phylogenetic analysis of new world buntings. *The American  
664 Naturalist*, **171**(6), 755–776.
- 665 Stoddard, M.C. & Stevens, M. (2011) Avian vision and the evolution of egg color  
666 mimicry in the common cuckoo. *Evolution*, **65**(7), 2004–2013.
- 667 Troscianko, J., Wilson-Aggarwal, J., Stevens, M. & Spottiswoode, C.N. (2016) Cam-  
668 ouflage predicts survival in ground-nesting birds. *Scientific reports*, **6**.
- 669 Vasas, V., Brebner, J.S., Chittka, L. & Simmons, L. (2017) Color discrimination is  
670 not just limited by photoreceptor noise: a comment on olsson et al. *Behavioral  
671 Ecology*.
- 672 Vorobyev, M., Osorio, D., Bennett, A.T., Marshall, N. & Cuthill, I. (1998) Tetrachro-  
673 macy, oil droplets and bird plumage colours. *Journal of Comparative Physiology A*,  
674 **183**(5), 621–633.
- 675 Vorobyev, M., Brandt, R., Peitsch, D., Laughlin, S.B. & Menzel, R. (2001) Colour  
676 thresholds and receptor noise: behaviour and physiology compared. *Vision re-  
677 search*, **41**(5), 639–653.



- 678 Vorobyev, M. & Osorio, D. (1998) Receptor noise as a determinant of colour thresh-  
679 olds. *Proceedings of the Royal Society of London B: Biological Sciences*, **265**(1394),  
680 351–358.
- 681 Warton, D.I., Wright, S.T. & Wang, Y. (2012) Distance-based multivariate analyses  
682 confound location and dispersion effects. *Methods in Ecology and Evolution*, **3**(1),  
683 89–101.
- 684 White, T.E., Dalrymple, R.L., Herberstein, M.E. & Kemp, D.J. (2017) The perceptual  
685 similarity of orb-spider prey lures and flower colours. *Evolutionary Ecology*, **31**(1),  
686 1–20.
- 687 White, T.E. & Kemp, D.J. (2017) Colour polymorphic lures exploit innate pref-  
688 erences for spectral versus luminance cues in dipteran prey. *BMC evolutionary*  
689 *biology*, **17**(1), 191.
- 690 Whiting, M.J., Noble, D.W. & Somaweera, R. (2015) Sexual dimorphism in con-  
691 spicuousness and ornamentation in the enigmatic leaf-nosed lizard *Ceratophora*  
692 *tennentii* from Sri Lanka. *Biological Journal of the Linnean Society*, **116**(3), 614–625.
